# Supplementary material for: Enhanced directional transfer of charge carriers and optimized electronic structure in fluorine doped polymeric carbon nitride nanosheets for efficient photocatalytic water splitting
Source: Royal Society of Chemistry journal article supplement (doi:10.1039/d4nr04550e), 2025-01-01
Supplement: d4nr04550e1.pdf [file d4nr04550e1.pdf]

1

## Supporting Information

2

# 3 **Enhanced directional transfer of charge carriers and** 4 **optimized electronic structure in fluorine doped polymeric** 5 **carbon nitride nanosheets for efficient photocatalytic water** 6 **splitting**

7 *Changxue Dong*<sup>1#</sup>, *Jin Zhang*<sup>1#</sup>, *Qiuyan Chen*<sup>1</sup>, *Hongrong Luo*<sup>2</sup>, *Jinwei Chen*<sup>\*1</sup> and  
8 *Ruilin Wang*<sup>\*1</sup>

9

10 # Changxue Dong and Jin Zhang contributed equally to this manuscript.

11 <sup>1</sup> College of Materials Science and Engineering, Sichuan University, Chengdu 610065,  
12 China.

13 <sup>2</sup> National Engineering Research Center for Biomaterials, Sichuan University, Chengdu  
14 610065, China.

15 *E-mail: jwchen@scu.edu.cn (Jinwei Chen), rl.wang@scu.edu.cn (Ruilin Wang)*

16

## 1 **Experimental Section**

### 2 **Chemicals and materials.**

3 Melamine ( $C_3H_6N_6$ ,  $\geq 99\%$ ), dicyandiamide ( $C_2H_4N_4$ , 98%), ammonium hydrogen  
4 fluoride ( $NH_4HF_2$ , 99.99%), and ethanol ( $C_2H_5OH$ ,  $\geq 99.7\%$ ) were all purchased from  
5 Aladdin Industrial Corporation and used without further purification. Ultrapure  
6 Millipore water (18.25 M $\Omega$ ) was used in all experiments.

### 7 **Instrumentations.**

8 TEM, HRTEM, and EDX mapping were carried out on a JED-2300T Analysis  
9 Station. XRD patterns were recorded by a DX-2700 X-ray diffraction (XRD)  
10 diffractometer. XPS measurement was performed on a Thermo Scientific NEXSA of  
11 ESCALAB 250Xi with an exciting source of Al  $K\alpha = 1486.6$  eV. The binding energies  
12 obtained in the XPS spectral analysis were corrected for specimen charging by  
13 referencing C 1s to 284.6 eV. PL spectra were measured on an Edinburgh FluoroLog-  
14 3 spectrofluorometer with an excitation wavelength ( $\lambda_{ex}$ ) of 350 nm. UV-vis diffuse  
15 reflectance data was recorded in the spectral region of 300-700 nm with a Shimadzu  
16 UV-3600i plus absorption spectrophotometer.

### 17 **Computational method.**

18 The present first-principle calculations are performed with the projector  
19 augmented wave (PAW) method based on DFT and VASP software. The exchange-  
20 functional is treated using the generalized gradient approximation (GGA) of Perdew-  
21 Burke-Ernzerhof (PBE). The cut-off energy of the plane-wave basis is set at 400 eV for  
22 optimizing calculations of atoms optimization. The vacuum spacing in a direction  
23 perpendicular to the plane of the catalyst is at least 20 Å for the surface to calculate the  
24 work functions. The Brillouin zone integration is performed using 3\*3\*1 Monkhorst  
25 and Pack k-point sampling for surface and interface. The self-consistent calculations  
26 apply a convergence energy threshold of  $10^{-6}$  eV. The maximum Hellmann-Feynman  
27 force for each ionic optimization step is 0.05 eV/Å.

28

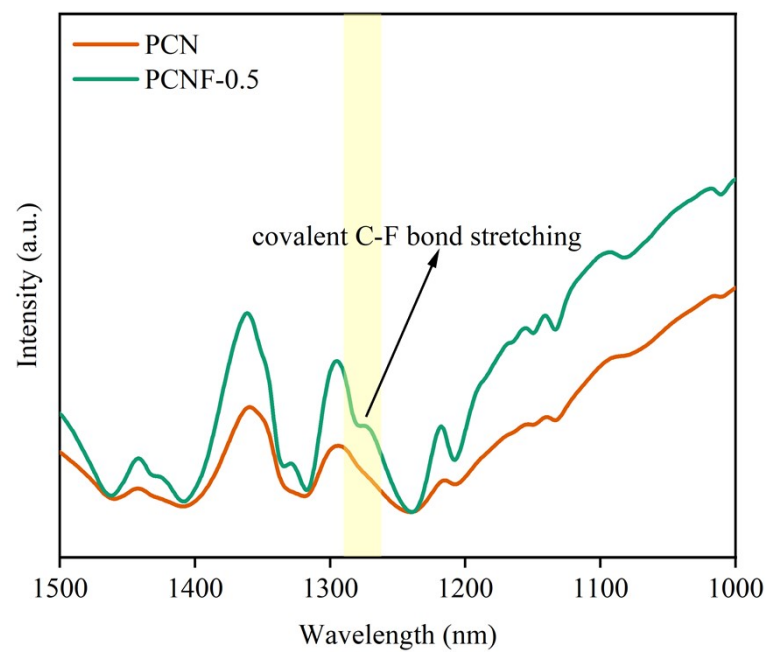

1

2

3 **Figure S1** FT-IR spectra of PCN and PCNF-0.5 photocatalysts at wavelength of 1000-

4 1500  $\text{cm}^{-1}$ .

5

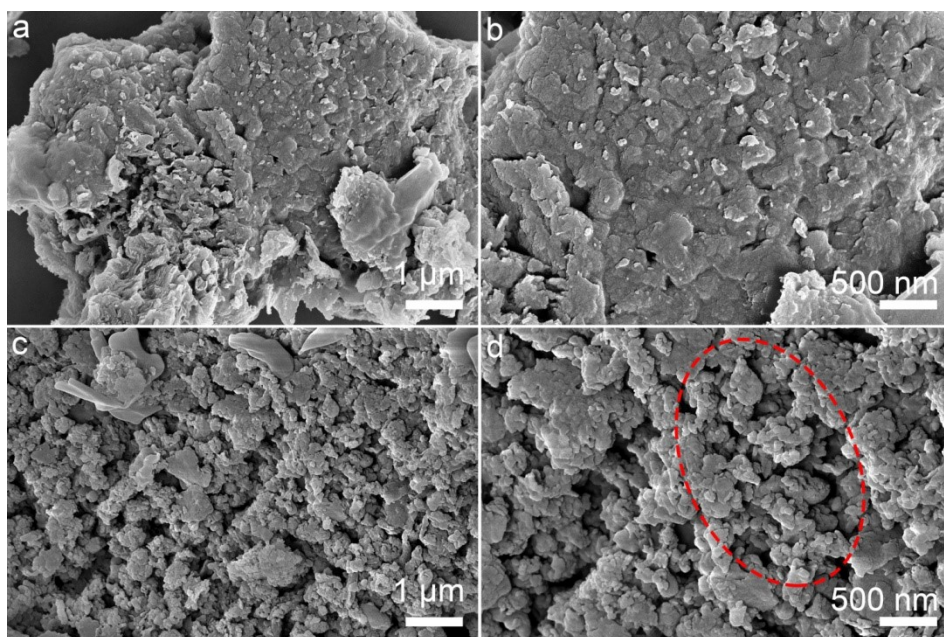

1  
2  
3  
4

**Figure S2** SEM images of pristine PCN (a-b) and (c-d) PCNF-0.5 photocatalysts.

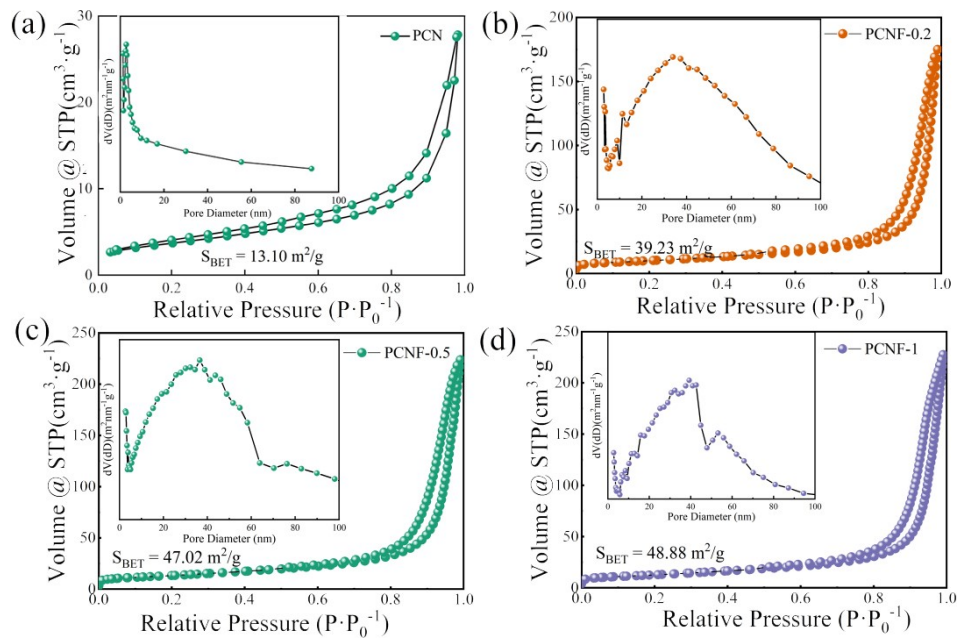

1

2

3 **Figure S3**  $N_2$  adsorption/desorption isotherms and (inset) pore size distribution of (a)

4 pristine PCN, (b) PCNF-0.2, (c) PCNF-0.5, and (d) PCNF-1 nanosheets.

5

1 **Table S1** The specific area of pristine PCN and PCNF-*x* nanosheets.

2

| Samples  | Specific area (m <sup>2</sup> g <sup>-1</sup> ) | Pore diameter (nm) |
|----------|-------------------------------------------------|--------------------|
| PCN      | 13.10                                           | 3.83               |
| PCNF-0.2 | 39.23                                           | 35.19              |
| PCNF-0.5 | 47.02                                           | 37.83              |
| PCNF-1   | 48.88                                           | 40.01              |

3

4

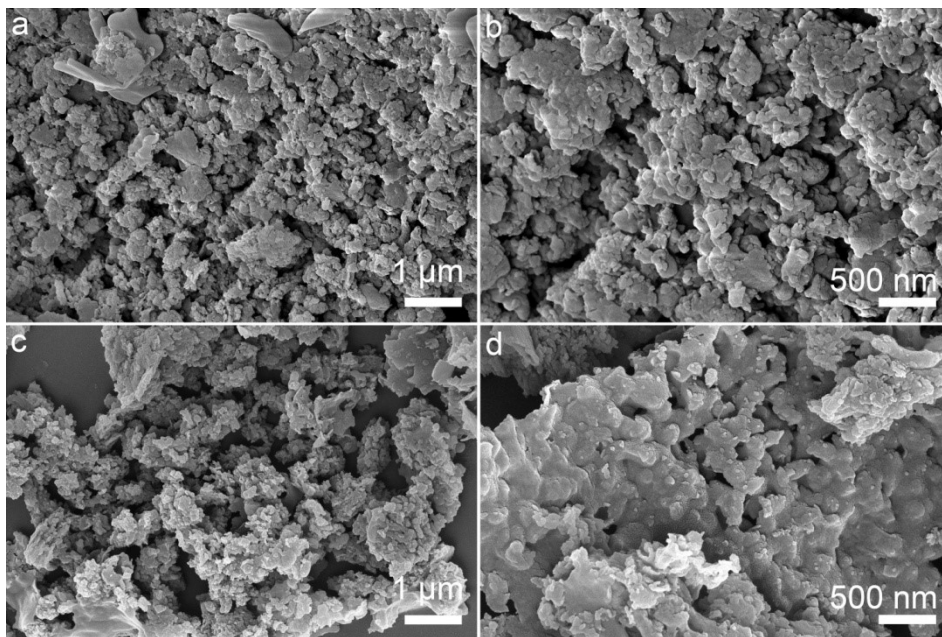

1

2

3 **Figure S4** SEM images of PCNF-0.5 nanosheets before (a-b) and after (c-d) 4 h

4 photocatalytic water splitting reaction.

5

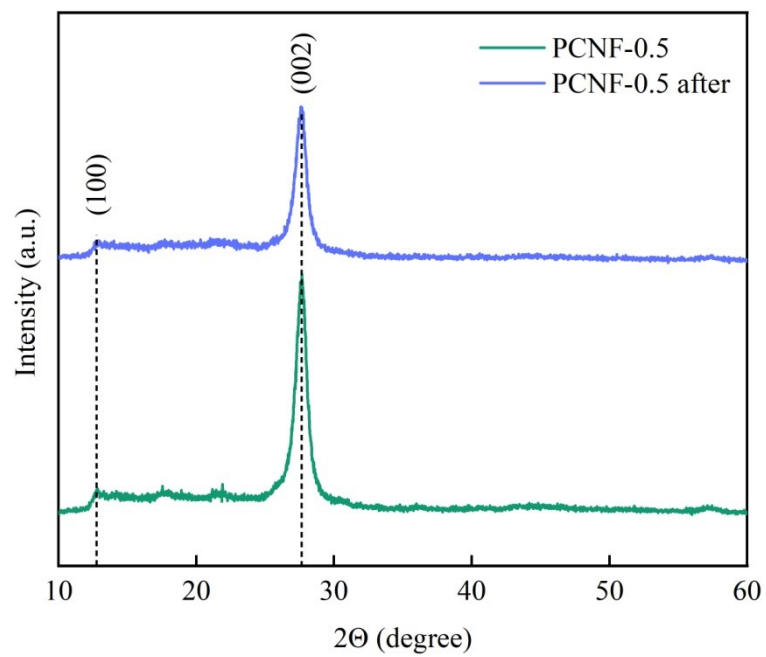

1

2

3 **Figure S5** XRD patterns of PCNF-0.5 nanosheets before and after 4 h photocatalytic

4 water splitting reaction.

5



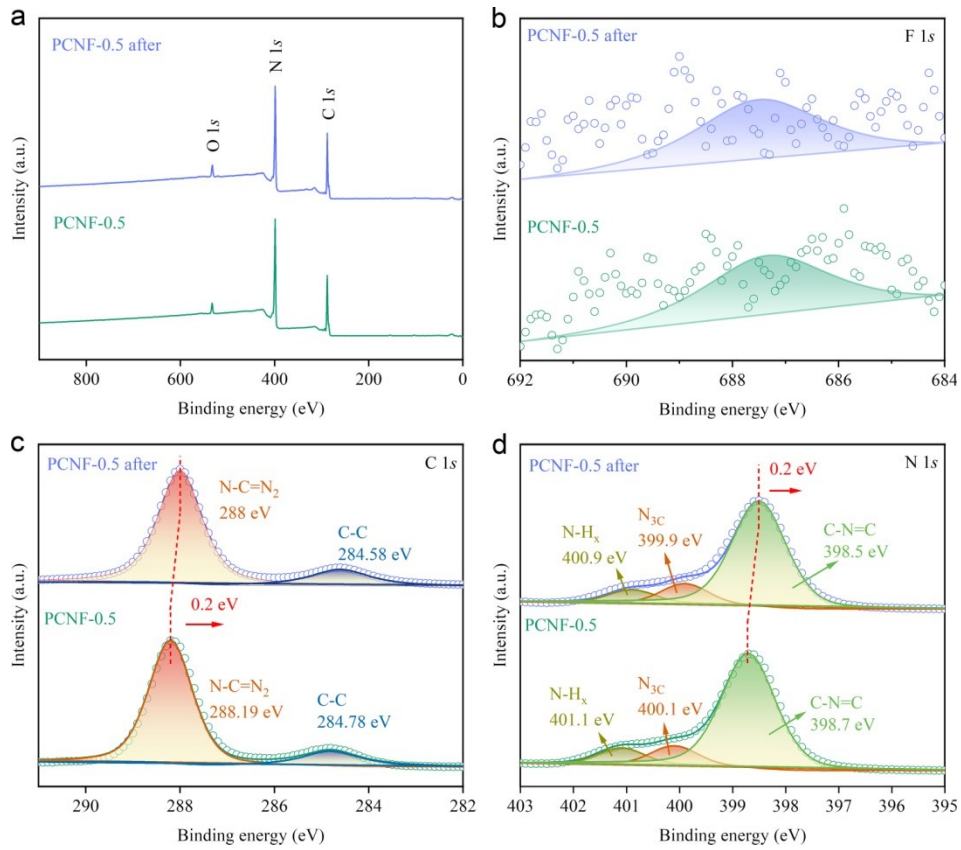

1

2

3 **Figure S6** XPS spectra of (a) full XPS, (b) F 1s, (c) C 1s, and (d) N 1s of PCNF-0.5

4 nanosheets before and after before and after 4 h photocatalytic water splitting reaction.

5

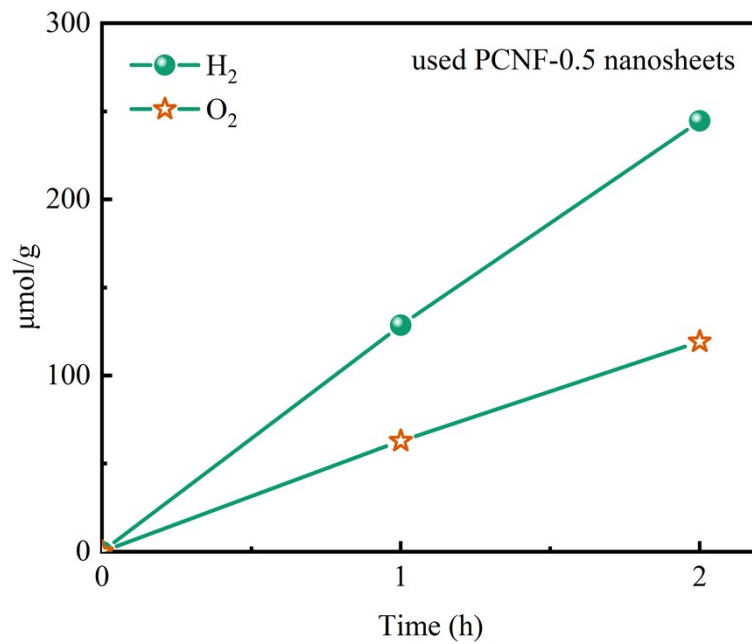

1

2

3 **Figure S7** The evolution rates of H<sub>2</sub> and O<sub>2</sub> for used PCNF-0.5 nanosheets (used PCNF-  
4 0.5 nanosheets: after 4 h photocatalytic water splitting, PCNF-0.5 photocatalysts is  
5 collected and settlement for 12 h).

6

1 **Table S2** Comparison of H<sub>2</sub> evolution rate and O<sub>2</sub> evolution rate of PCNF-0.5 and other

2 PCN-based photocatalysts recently reported.

3

| photocatalysts                | cocatalyst                        | H <sub>2</sub> evolution<br>( $\mu\text{mol g}^{-1} \text{h}^{-1}$ ) | O <sub>2</sub> evolution<br>( $\mu\text{mol g}^{-1} \text{h}^{-1}$ ) | ref       |
|-------------------------------|-----------------------------------|----------------------------------------------------------------------|----------------------------------------------------------------------|-----------|
| PCNF-0.5                      | Pt                                | 135.3                                                                | 63.7                                                                 | This work |
| CdS/WPCN                      | Pt/CrO <sub>x</sub>               | 238.8                                                                | 115.2                                                                | 1         |
| 0.5 g-SrTiO <sub>3</sub> -PCN | Pt/CoO <sub>x</sub>               | 172.0                                                                | 86.0                                                                 | 2         |
| CCN-6                         | Pt/Co                             | 156.0                                                                | 74.0                                                                 | 3         |
| W-PCN600                      | Pt                                | 88.0                                                                 | 46.0                                                                 | 4         |
| cPCNt-200/1.5                 | Pt/Co(OH) <sub>2</sub>            | 48.2                                                                 | 23.0                                                                 | 5         |
| COCNT                         | Pt/Co                             | 37.4                                                                 | 18.5                                                                 | 6         |
| Zn-PCN(4.79%)                 | Pt                                | 35.2                                                                 | 17.3                                                                 | 7         |
| Rh-RhO <sub>x</sub> /PCN      | Rh/RhO <sub>x</sub>               | 28.0                                                                 | 12.0                                                                 | 8         |
| CCC@PCN                       | Pt/Co <sub>3</sub> O <sub>4</sub> | 22.0                                                                 | 44.0                                                                 | 9         |

4

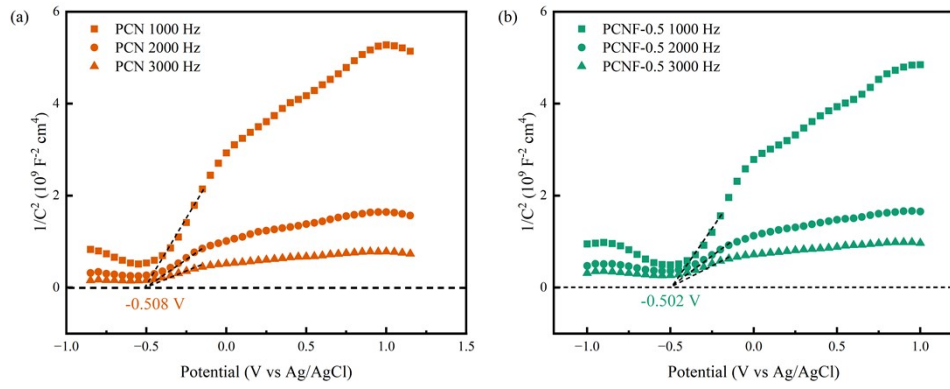

1

2

3 **Figure S8** Mott-Schottky plots of (a) pristine PCN and (b) PCNF-0.5 nanosheets

4 under different frequency.

5

1 **Table S3** The flatband potential of pristine PCN and PCNF-0.5 nanosheets.

2

| Samples  | Flatband potential (V vs. Ag/AgCl) |
|----------|------------------------------------|
| PCN      | 0.508                              |
| PCNF-0.5 | 0.502                              |

3

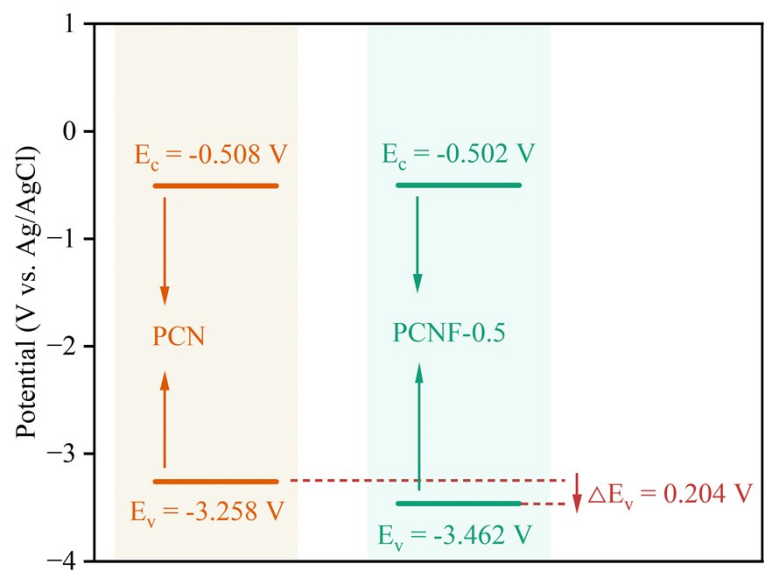

1

2

3 **Figure S9** Bandgap structure of pristine PCN and PCNF-0.5 nanosheets.

4

1 **Table S4** Transient photoluminescence decay data of pristine PCN and PCNF-0.5

2 photocatalysts (PL emission peak of 440 nm).

3

| Samples  | $\tau_1$ (ns) | $A_1$  | $\tau_2$ (ns) | $A_2$  | $\tau_3$ (ns) | $A_3$  | $\tau_{ave}$ (ns) |
|----------|---------------|--------|---------------|--------|---------------|--------|-------------------|
| PCN      | 1.4037        | 0.2502 | 4.7289        | 0.5701 | 22.2775       | 0.1797 | 14.53             |
| PCNF-0.5 | 0.4484        | 0.1714 | 1.7042        | 0.5182 | 7.0835        | 0.3104 | 5.42              |

4

5

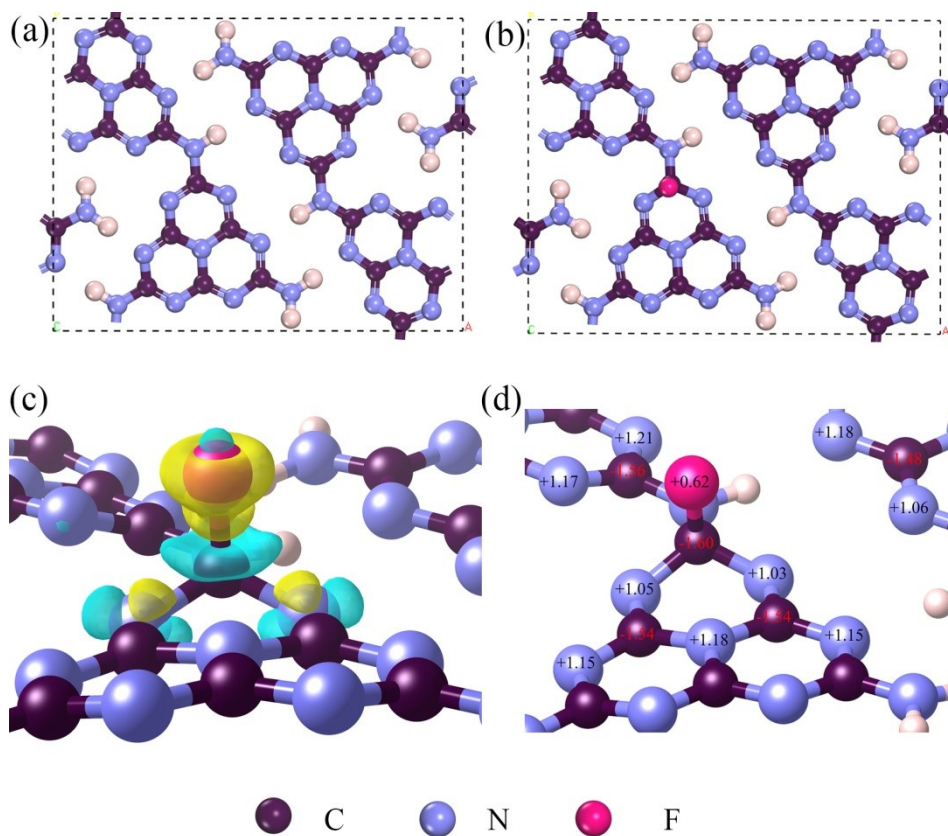

1

2

3 **Figure S10** (a) PCN and (b) PCNF model. (c) Differential charge density (the yellow

4 and blue areas denote the charge accumulation and depletion, respectively. The

5 isosurface value of differential charge density distribution is  $0.01 \text{ e \AA}^{-3}$ ), and (d) Bader

6 charge on the model of PCNF.

7



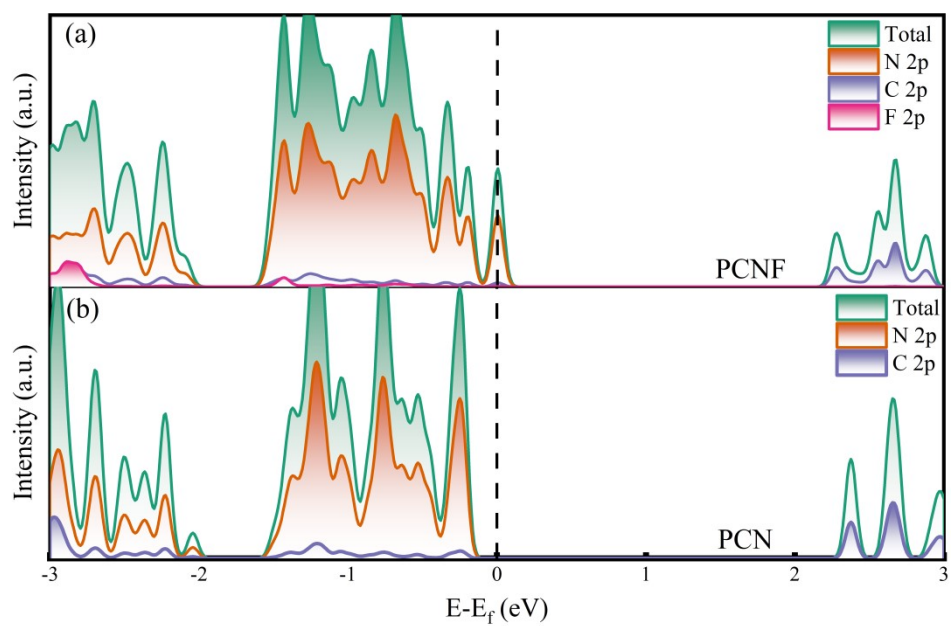

1

2

3 **Figure S11** The partial density of states (PDOS) of (a) PCNF model and (b) PCN

4 model.

5

## 1 **The photocatalytic water splitting mechanism of PCNF photocatalysts:**

2 The photocatalytic water splitting reaction formula is as follows:  $2\text{H}_2\text{O} \rightarrow 2\text{H}_2 + \text{O}_2$ ,  
3 which involves two half reactions of hydrogen evolution reaction and oxygen evolution  
4 reaction.

5 In PCNF photocatalysts, the photogenerated holes and electrons which produced  
6 by photoexcitation have two paths, one is recombination inside the photocatalyst, and  
7 the other is migration to the surface of the photocatalyst to participate in hydrogen  
8 evolution and oxygen evolution reaction. Specifically, for the hydrogen evolution  
9 reaction, Pt on the surface of PCNF photocatalysts is acted as the hydrogen evolution  
10 reaction active site, and the photogenerated electrons migrate to Pt active sites on the  
11 surface of the photocatalyst, reacted with  $\text{H}^+$  which adsorbed by Pt active sites, and  
12 occurred hydrogen evolution reaction.

13 For the oxygen evolution reaction, because there is no sacrificial agent in the  
14 photocatalytic water splitting reaction, the photogenerated holes exist on the surface of  
15 the PCNF-0.5 photocatalyst. According to the DFT calculation results, the two-  
16 coordinated N atom which coordinated with C-F bonds is the active site of the oxygen  
17 evolution reaction, which reduces the energy barrier of the rate determining step ( $^*\text{O}$  to  
18  $^*\text{OOH}$ ). Therefore, the photogenerated holes preferentially migrate to the two-  
19 coordination N atoms to participate in the oxygen evolution reaction.

20 In all, the photogenerated carriers separated in the PCNF photocatalysts, migrated  
21 to the active site on the surface of the photocatalyst, and occurred the photocatalytic  
22 water splitting reaction.

23

## 1 References

- 2 (1) Li, H.; Yu, F.; Li, A.; Deng, Q.; Hu, W.; Hou, W. Metal single atom-oxygen modification induced  
3 transformation of carbon nitride-based heterojunctions from type-II to S-scheme for efficient  
4 photocatalytic overall water splitting. *Chemical Engineering Journal* **2024**, *489*. DOI:  
5 10.1016/j.cej.2024.151219.
- 6 (2) Wei, Z.; Yan, J.; Guo, W.; Shangguan, W. Nanoscale lamination effect by nitrogen-deficient polymeric  
7 carbon nitride growth on polyhedral SrTiO<sub>3</sub> for photocatalytic overall water splitting: Synergy  
8 mechanism of internal electrical field modulation. *Chinese Journal of Catalysis* **2023**, *48*, 279-289. DOI:  
9 10.1016/s1872-2067(23)64414-6.
- 10 (3) Zhang, G.; Xu, Y.; Zhu, J.; Li, Y.; He, C.; Ren, X.; Zhang, P.; Mi, H. Enhanced photocatalytic H<sub>2</sub>  
11 production independent of exciton dissociation in crystalline carbon nitride. *Applied Catalysis B:  
12 Environmental* **2023**, *338*. DOI: 10.1016/j.apcatb.2023.123049.
- 13 (4) Yu, F.; Deng, Q.; Li, H.; Xia, Y.; Hou, W. A general strategy to synthesize single-atom metal-oxygen  
14 doped polymeric carbon nitride with highly enhanced photocatalytic water splitting activity. *Applied  
15 Catalysis B: Environmental* **2023**, *323*. DOI: 10.1016/j.apcatb.2022.122180.
- 16 (5) Liang, Z.; Zhuang, X.; Tang, Z.; Deng, Q.; Li, H.; Kang, W. High-crystalline polymeric carbon nitride  
17 flake composed porous nanotubes with significantly improved photocatalytic water splitting activity:  
18 The optimal balance between crystallinity and surface area. *Chemical Engineering Journal* **2022**, *432*.  
19 DOI: 10.1016/j.cej.2021.134388.
- 20 (6) Jiang, Y.; Cao, C.; Tan, Y.; Chen, Q.; Zeng, L.; Yang, W.; Sun, Z.; Huang, L. A facile method to introduce  
21 a donor-acceptor system into polymeric carbon nitride for efficient photocatalytic overall water  
22 splitting. *Journal of Materials Science & Technology* **2023**, *141*, 32-41. DOI: 10.1016/j.jmst.2022.09.024.
- 23 (7) Zhao, D.; Wang, Y.; Dong, C.-L.; Meng, F.; Huang, Y.-C.; Zhang, Q.; Gu, L.; Liu, L.; Shen, S. Electron-  
24 Deficient Zn-N<sub>6</sub> Configuration Enabling Polymeric Carbon Nitride for Visible-Light Photocatalytic Overall  
25 Water Splitting. *Nano-Micro Letters* **2022**, *14* (1). DOI: 10.1007/s40820-022-00962-x.
- 26 (8) Pan, Z.; Wang, S.; Niu, P.; Liu, M.; Wang, X. Photocatalytic overall water splitting by spatially-  
27 separated Rh and RhO<sub>x</sub> cocatalysts on polymeric carbon nitride nanosheets. *Journal of Catalysis* **2019**,  
28 *379*, 129-137. DOI: 10.1016/j.jcat.2019.09.016.
- 29 (9) Zheng, D.; Yang, L.; Chen, W.; Fang, Y.; Wang, X. Coating Polymeric Carbon Nitride on Conductive  
30 Carbon Cloth to Promote Charge Separation for Photocatalytic Water Splitting. *ChemSusChem* **2021**, *14*  
31 (18), 3821-3824. DOI: 10.1002/cssc.202101346.

32
